# Supplementary material for: Effect of Cellulose Nanofibers’ Structure and Incorporation Route in Waterborne Polyurethane–Urea Based Nanocomposite Inks
Source: MDPI journal article supplement (doi:10.3390/polym14214516), 2022-10-25
Supplement: s1 [file s1]

# Effect of Cellulose Nanofibers' Structure and Incorporation Route in Waterborne Polyurethane–Urea Based Nanocomposite Inks

Izaskun Larraza <sup>1</sup>, Julen Vadillo <sup>1,2,3</sup>, Tamara Calvo-Correas <sup>1,4</sup>, Alvaro Tejado <sup>5</sup>, Loli Martin <sup>6</sup>, Aitor Arbelaiz <sup>1,\*</sup> and Arantxa Eceiza <sup>1,\*</sup>

<sup>1</sup> Materials + Technologies' Research Group (GMT), Department of Chemical and Environmental Engineering, Faculty of Engineering of Gipuzkoa, University of the Basque Country, Pza Europa 1, 20018 Donostia-San Sebastian, Spain

<sup>2</sup> IPREM-Equipe de Physique et Chimie des Polymères, UMR CNRS 5254, Université de Pau et des Pays de l'Adour, Hélioparc 2, Av. Pdt Angot, CEDEX 09, 64053 Pau, France

<sup>3</sup> CIDETEC, Basque Research and Technology Alliance (BRTA), Po. Miramon 196, 20014 Donostia-San Sebastian, Spain

<sup>4</sup> Department of Environmental Engineering, Faculty of Engineering of Vitoria-Gasteiz, University of the Basque Country, Nieves Cano Street, 12, 01006 Vitoria-Gasteiz, Spain

<sup>5</sup> TECNALIA, Basque Research and Technology Alliance (BRTA), Area Anardi 5, 20730 Azpeitia, Spain

<sup>6</sup> Macrobehavior-Mesostructure-Nanotechnology, General Research Service (SGIker), Polytechnic School, University of the Basque Country, Plaza Europa 1, 20018 Donostia-San Sebastián, Spain

\* Correspondence: aitor.arbelaiz@ehu.eus (A.A.); arantxa.eceiza@ehu.eus (A.E.)

## Thermogravimetric Analysis (TGA)

The thermal stability of the freeze-dried materials was determined by thermogravimetric analysis (TGA). TGA was performed in a TGA/STDA 851 (Mettler Toledo) equipment. The samples, between 5–10 mg, were heated from 30 to 700 °C in a nitrogen atmosphere at a scanning rate of 10 °C min<sup>−1</sup>.

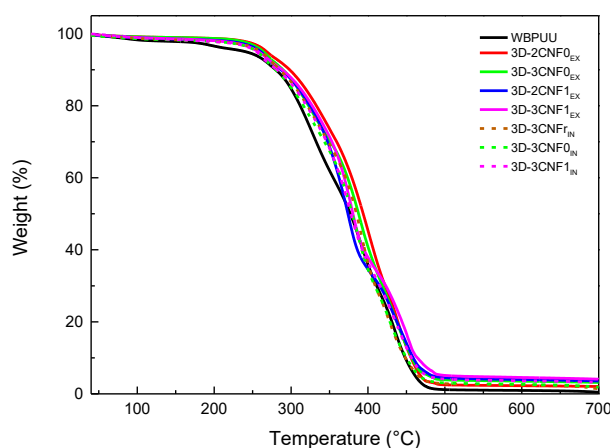

**Figure S1.** Weight evolution of freeze-dried neat WBPU and WBPU/CNF 3D printed parts.

### Dynamic Mechanical Analysis (DMA)

The thermomechanical behavior of the 3D printed parts was determined by dynamic mechanical analysis (DMA) using an Eplexor 100 N analyzer Gabo equipment. The measurements were carried out in compression mode from  $-100$  to  $180$  °C at a scanning rate of  $2$  °C  $\text{min}^{-1}$ . The initial strain was established as  $0.3$  % and the operating frequency was fixed at  $1$  Hz.

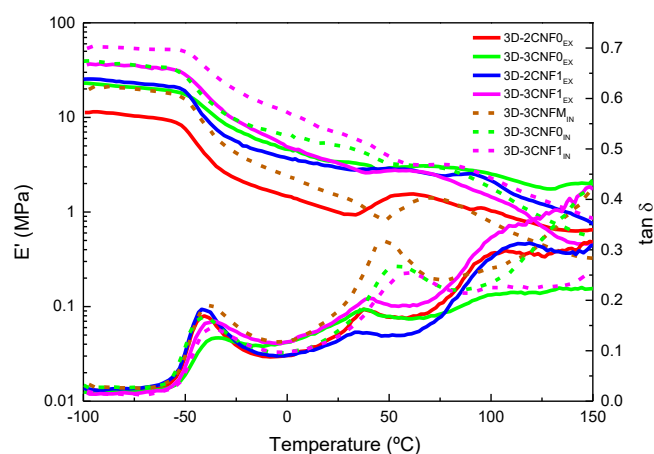

**Figure S2.** Storage modulus and  $\tan \delta$  of freeze-dried neat WBPU and WBPU/CNF 3D printed parts.
